# Supplementary material
Source: publisher site journal article supplement (https://studysites.sagepub.com/dymoke/09-Dymoke-Appendix.pdf)
Supplement: Supplementary file 1 [file 09-Dymoke-Appendix.pdf]

APPENDIX USING ACTIVITIES IN  
THIS BOOK TO HELP YOU TO  
ACHIEVE THE STANDARDS FOR QTS

The activities listed alongside each Standard in the chart are designed to support your critical reflection and professional development in particular areas during the university and school/ college-based stages of your course.

| Professional attributes                                                                                                                                                                                                                            | Activities                                                             |
|----------------------------------------------------------------------------------------------------------------------------------------------------------------------------------------------------------------------------------------------------|------------------------------------------------------------------------|
| Q1                                                                                                                                                                                                                                                 | 1.2, 6.3, 6.4, 6.5                                                     |
| Have high expectations of children and young people including a commitment to ensuring that they can achieve their full educational potential and to establishing fair, respectful, trusting, supportive and constructive relationships with them. |                                                                        |
| Q2                                                                                                                                                                                                                                                 | 6.3, 6.4, 6.5, 7.9                                                     |
| Demonstrate the positive values, attitudes and behaviour they expect from children and young people.                                                                                                                                               |                                                                        |
| Q3                                                                                                                                                                                                                                                 | 5.10, 6.9                                                              |
| (a) Be aware of the professional duties of teachers and the statutory framework within which they work.                                                                                                                                            |                                                                        |
| Q3                                                                                                                                                                                                                                                 | 5.10, 6.9                                                              |
| (b) Be aware of the policies and practices of the workplace and share in collective responsibility for their implementation.                                                                                                                       |                                                                        |
| Q4                                                                                                                                                                                                                                                 | 5.8, 5.9, 7.7, 7.8                                                     |
| Communicate effectively with children, young people, colleagues, parents and carers.                                                                                                                                                               |                                                                        |
| Q5                                                                                                                                                                                                                                                 | 4.11, 5.9, 7.4                                                         |
| Recognise and respect the contribution that colleagues, parents and carers can make to the development and well-being of children and young people and to raising their levels of attainment.                                                      |                                                                        |
| Q6                                                                                                                                                                                                                                                 | 4.11, 7.4                                                              |
| Have a commitment to collaboration and co-operative working.                                                                                                                                                                                       |                                                                        |
| Q7                                                                                                                                                                                                                                                 | 1.2, 1.3, 1.4, 1.5, 1.6, 1.7, 2.1, 2.3, 3.9, 3.10, 3.11, 6.3, 6.4, 6.5 |
| (a) Reflect on and improve their practice, and take responsibility for identifying and meeting their developing professional needs<br>(b) Identify priorities for their early professional development in the context of induction.                |                                                                        |
| Q8                                                                                                                                                                                                                                                 | 1.4, 1.7, 2.1, 3.11, 6.7, 7.7                                          |
| Have a creative and constructively critical approach towards innovation, being prepared to adapt their practice where benefits and improvements are identified.                                                                                    |                                                                        |
| Q9                                                                                                                                                                                                                                                 | 3.11d, 4.1b                                                            |
| Act upon advice and feedback and be open to coaching and mentoring.                                                                                                                                                                                |                                                                        |

**Appendix (Continued)**

| <b>Professional attributes</b>                  |                                                                                                                                                                                                                                                                                           | <b>Activities</b>                                                                                                                                                                                                                                                                                                                                   |
|-------------------------------------------------|-------------------------------------------------------------------------------------------------------------------------------------------------------------------------------------------------------------------------------------------------------------------------------------------|-----------------------------------------------------------------------------------------------------------------------------------------------------------------------------------------------------------------------------------------------------------------------------------------------------------------------------------------------------|
| <b>Professional knowledge and understanding</b> |                                                                                                                                                                                                                                                                                           |                                                                                                                                                                                                                                                                                                                                                     |
| <b>Q10</b>                                      | Have a knowledge and understanding of a range of teaching, learning and behaviour management strategies and know how to use and adapt them, including how to personalise learning and provide opportunities for all learners to achieve their potential.                                  | 2.1, 2.2, 2.5, 2.6, 3.1, 3.4, 6.3, 6.4, 7.7                                                                                                                                                                                                                                                                                                         |
| <b>Q11</b>                                      | Know the assessment requirements and arrangements for the subjects/curriculum areas they are trained to teach, including those relating to public examinations and qualifications.                                                                                                        | 3.6, 5.3, 5.7, 5.8                                                                                                                                                                                                                                                                                                                                  |
| <b>Q12</b>                                      | Know a range of approaches to assessment, including the importance of formative assessment.                                                                                                                                                                                               | 5.1, 5.2, 5.4, 5.5, 5.6, 5.7                                                                                                                                                                                                                                                                                                                        |
| <b>Q13</b>                                      | Know how to use local and national statistical information to evaluate the effectiveness of their teaching, to monitor the progress of those they teach and to raise levels of attainment.                                                                                                | 5.11, 5.12                                                                                                                                                                                                                                                                                                                                          |
| <b>Q14</b>                                      | Have a secure knowledge and understanding of their subjects/curriculum areas and related pedagogy to enable them to teach effectively across the age and ability range for which they are trained.                                                                                        | Your competence in this standard will be developed primarily through your prior learning, your own course subject sessions which will help you to transform your subject knowledge into pedagogic knowledge and your own teaching. However, many of the activities in Chapters 2–7 will support your developing understanding of pedagogical issues |
| <b>Q15</b>                                      | Know and understand the relevant statutory and non-statutory curricula, and frameworks, including those provided through the National Strategies, for their subjects/curriculum areas, and other relevant initiatives applicable to the age and ability range for which they are trained. | 3.2, 3.5, 3.6, 3.7, 3.9, 3.10, 3.11, 6.6, 6.7, 6.10, 6.11, 7.10, 7.11                                                                                                                                                                                                                                                                               |

(Continued)

**Appendix (Continued)**

|            | <b>Professional attributes</b>                                                                                                                                                                                                                                                                                                                                                                                           | <b>Activities</b>                                         |
|------------|--------------------------------------------------------------------------------------------------------------------------------------------------------------------------------------------------------------------------------------------------------------------------------------------------------------------------------------------------------------------------------------------------------------------------|-----------------------------------------------------------|
| <b>Q16</b> | Have passed the professional skills tests in numeracy, literacy and information and communication technology (ICT).                                                                                                                                                                                                                                                                                                      | 3.9, 3.10, 3.11                                           |
| <b>Q17</b> | Know how to use skills in literacy, numeracy and ICT to support their teaching and wider professional activities.                                                                                                                                                                                                                                                                                                        | 3.8, 3.9, 3.10, 3.11                                      |
| <b>Q18</b> | Understand how children and young people develop and that the progress and well-being of learners are affected by a range of developmental, social, religious, ethnic, cultural and linguistic influences.                                                                                                                                                                                                               | 2.1, 2.2, 2.4, 2.6, 3.2, 3.4, 3.5, 6.3, 6.4, 6.5, 7.2     |
| <b>Q19</b> | Know how to make effective personalised provision for those they teach, including those for whom English is an additional language or who have special educational needs or disabilities, and how to take practical account of diversity and promote equality and inclusion in their teaching.                                                                                                                           | 3.2, 3.3, 3.5, 4.12, 6.3, 6.4, 6.5, 6.10, 6.11, 7.2       |
| <b>Q20</b> | Know and understand the roles of colleagues with specific responsibilities, including those with responsibility for learners with special educational needs and disabilities and other individual learning needs.                                                                                                                                                                                                        | 3.2, 3.4, 3.5, 3.9, 3.10, 5.10c, 6.8, 6.9, 7.4, 7.5d      |
| <b>Q21</b> | <p>(a) Be aware of current legal requirements, national policies and guidance on the safeguarding and promotion of the well-being of children and young people.</p> <p>(b) Know how to identify and support children and young people whose progress, development or well-being is affected by changes or difficulties in their personal circumstances, and when to refer them to colleagues for specialist support.</p> | <p>3.2, 6.12, 7.3, 7.6</p> <p>3.2, 7.5, 7.6, 7.7, 7.8</p> |

| <b>Appendix (Continued)</b>                                                         |                                                                                                                                                                                                                                                                                                                                                                                                                                                                                                                                                                                                                                                                                                                                                                                                                                                                                                                    |
|-------------------------------------------------------------------------------------|--------------------------------------------------------------------------------------------------------------------------------------------------------------------------------------------------------------------------------------------------------------------------------------------------------------------------------------------------------------------------------------------------------------------------------------------------------------------------------------------------------------------------------------------------------------------------------------------------------------------------------------------------------------------------------------------------------------------------------------------------------------------------------------------------------------------------------------------------------------------------------------------------------------------|
| <b>Professional attributes</b>                                                      | <b>Activities</b>                                                                                                                                                                                                                                                                                                                                                                                                                                                                                                                                                                                                                                                                                                                                                                                                                                                                                                  |
| <b>Professional skills</b>                                                          |                                                                                                                                                                                                                                                                                                                                                                                                                                                                                                                                                                                                                                                                                                                                                                                                                                                                                                                    |
| <b>These will be particularly demonstrated during school or college placements.</b> |                                                                                                                                                                                                                                                                                                                                                                                                                                                                                                                                                                                                                                                                                                                                                                                                                                                                                                                    |
| <b>Q22</b>                                                                          | Plan for progression across the age and ability range for which they are trained, designing effective learning sequences within lessons and across series of lessons and demonstrating secure subject/curriculum knowledge. 4.2, 4.3, 5.11c                                                                                                                                                                                                                                                                                                                                                                                                                                                                                                                                                                                                                                                                        |
| <b>Q23</b>                                                                          | Design opportunities for learners to develop their literacy, numeracy and ICT skills. 3.8, 3.9, 3.10, 3.11, 4.13b                                                                                                                                                                                                                                                                                                                                                                                                                                                                                                                                                                                                                                                                                                                                                                                                  |
| <b>Q24</b>                                                                          | Plan homework or other out-of-class work to sustain learners' progress and to extend and consolidate their learning. 5.3                                                                                                                                                                                                                                                                                                                                                                                                                                                                                                                                                                                                                                                                                                                                                                                           |
| <b>Q25</b>                                                                          | Teach lessons and sequences of lessons across the age and ability range for which they are trained in which they: <ul style="list-style-type: none"> <li>(a) use a range of teaching strategies and resources, including e-learning, taking practical account of diversity and promoting equality and inclusion;</li> <li>(b) build on prior knowledge, develop concepts and processes, enable learners to apply new knowledge, understanding and skills and meet learning objectives;</li> <li>(c) adapt their language to suit the learners they teach, introducing new ideas and concepts clearly, and using explanations, questions, discussions and plenaries effectively;</li> <li>(d) demonstrate the ability to manage the learning of individuals, groups and whole classes, modifying their teaching to suit the stage of the lesson.</li> </ul> 2.5, 3.3, 3.4, 4.13b<br>3.8, 3.9, 4.8, 4.9<br>4.10, 7.7 |

(Continued)

**Appendix (Continued)**

|            | <b>Professional attributes</b>                                                                                                                                                                         | <b>Activities</b>                    |
|------------|--------------------------------------------------------------------------------------------------------------------------------------------------------------------------------------------------------|--------------------------------------|
| <b>Q26</b> | <p>(a) Make effective use of a range of assessment, monitoring and recording strategies.</p> <p>(b) Assess the learning needs of those they teach in order to set challenging learning objectives.</p> | <p>5.3, 5.4, 5.5, 5.6</p> <p>3.3</p> |
| <b>Q27</b> | <p>Provide timely, accurate and constructive feedback on learners' attainment, progress and areas for development.</p>                                                                                 | <p>5.8, 5.9</p>                      |
| <b>Q28</b> | <p>Support and guide learners to reflect on their learning, identify the progress they have made and identify their emerging learning needs.</p>                                                       | <p>5.5, 6.11, 7.7, 7.8</p>           |
| <b>Q29</b> | <p>Evaluate the impact of their teaching on the progress of all learners, and modify their planning and classroom practice where necessary.</p>                                                        | <p>1.4, 1.7, 2.5, 5.6</p>            |
| <b>Q30</b> | <p>Establish a purposeful and safe learning environment conducive to learning and identify opportunities for learners to learn in out of school contexts.</p>                                          | <p>4.4, 4.5, 7.1, 7.2</p>            |
| <b>Q31</b> | <p>Establish a clear framework for classroom discipline to manage learners' behaviour constructively and promote their self-control and independence.</p>                                              | <p>4.6, 4.7</p>                      |
| <b>Q32</b> | <p>Work as a team member and identify opportunities for working with colleagues, sharing the development of effective practice with them.</p>                                                          | <p>4.11, 7.4, 7.8</p>                |
| <b>Q33</b> | <p>Ensure that colleagues working with them are appropriately involved in supporting learning and understand the roles they are expected to fulfil.</p>                                                | <p>4.11, 7.4</p>                     |
